# Supplementary material for: Benchmarking AlphaFold for protein complex modeling reveals accuracy determinants
Source: PubMed Central journal article supplement (PMC9278006; doi:10.1002/pro.4379), 2022-07-13
Supplement: PRO-31-e4379-s001.pdf [file PRO-31-e4379-s001.pdf]

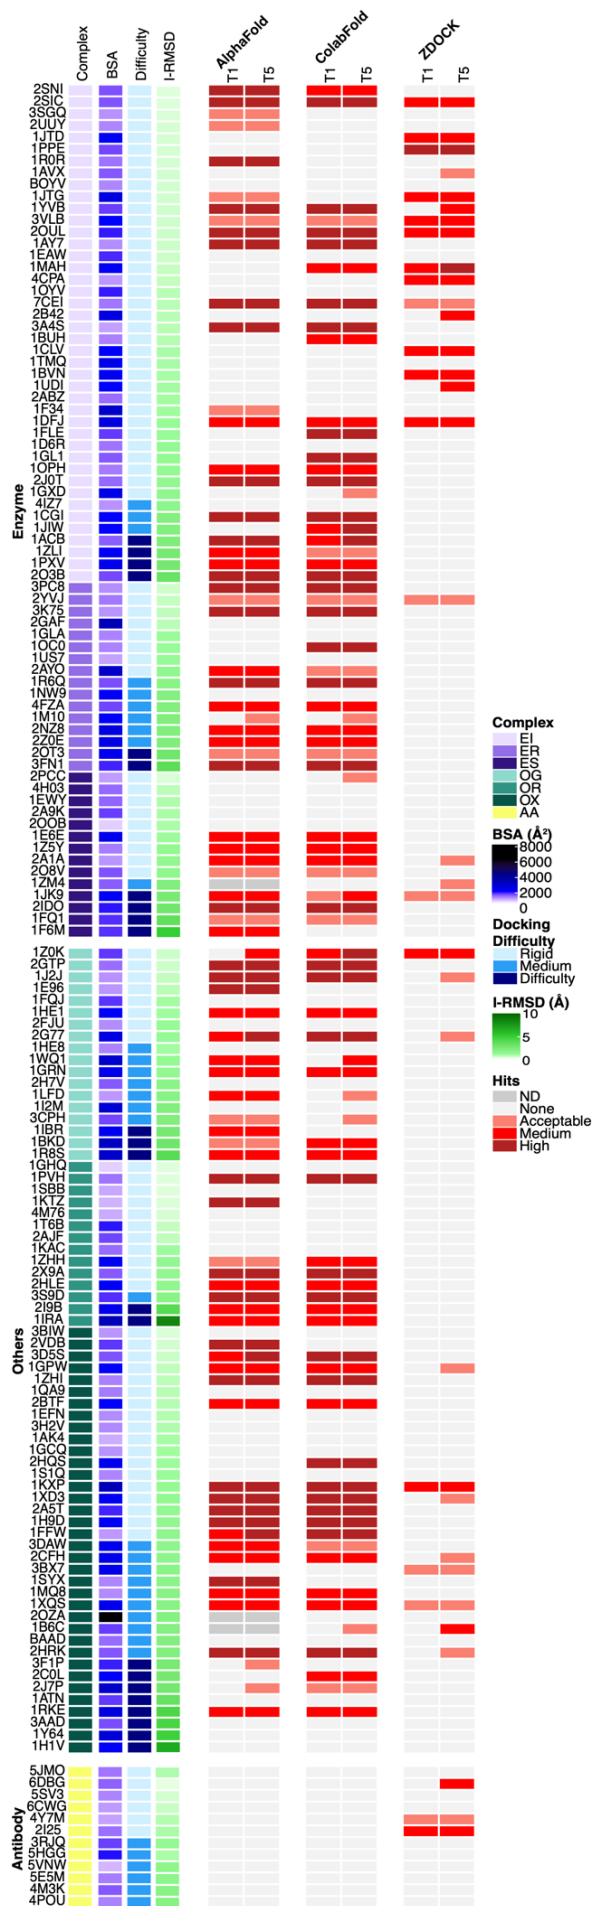

**Figure S1. Predictive modeling success of AlphaFold, ColabFold, and ZDOCK.** Cases are grouped and sorted by complex type. For reference, complex category, buried surface area (BSA, Å<sup>2</sup>), docking difficulty based on binding conformational changes, and binding interface root mean square distance (I-RMSD) are indicated on the left. Complex category: Enzyme-inhibitor (EI), enzyme complex with a regulatory or accessory chain (ER), enzyme-substrate (ES), others, G-protein containing (OG), others, receptor-containing (OR); others, miscellaneous (OX), antibody-antigen (AA). Success for top 1 and top 5 (T1, T5) ranked predictions is shown, colored by CAPRI model accuracy as indicated in the key on right (Hits). Three cases failed to complete in AlphaFold and are shown as dark gray cells (“ND” under Hits).

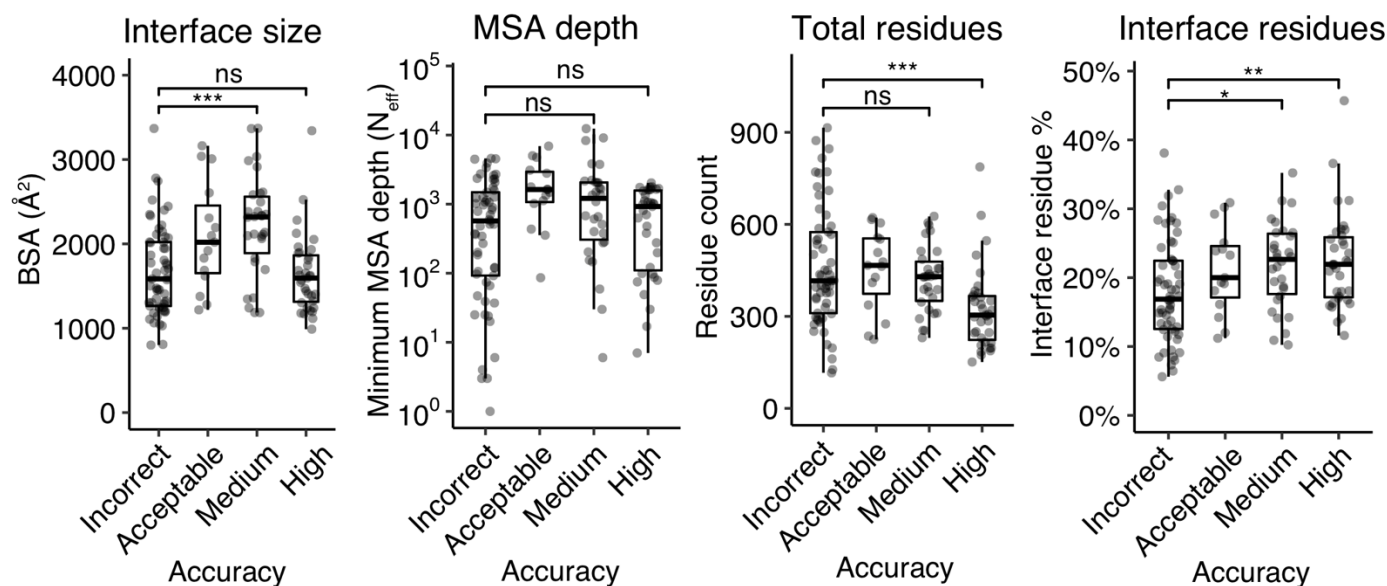

**Figure S2. Assessment of features associated with AlphaFold success or lack of success, with antibody complexes excluded.** Protein complex and MSA feature values were computed for all cases except for antibody-antigen complexes, shown according to AlphaFold success (best AlphaFold model accuracy in the five models for that case). Features shown are interface buried surface area (BSA), MSA depth ( $N_{\text{eff}}$ ) for the ligand or receptor (minimum value of the two), total number of residues, and percent of total residues in protein-protein interface. Statistical significance values (Wilcoxon rank-sum test) were calculated between feature values for sets of cases with Incorrect vs. Medium and Incorrect vs. High CAPRI accuracy, as noted at top (ns:  $p > 0.05$ , \*:  $p \leq 0.05$ , \*\*:  $p \leq 0.01$ , \*\*\*:  $p \leq 0.001$ ).

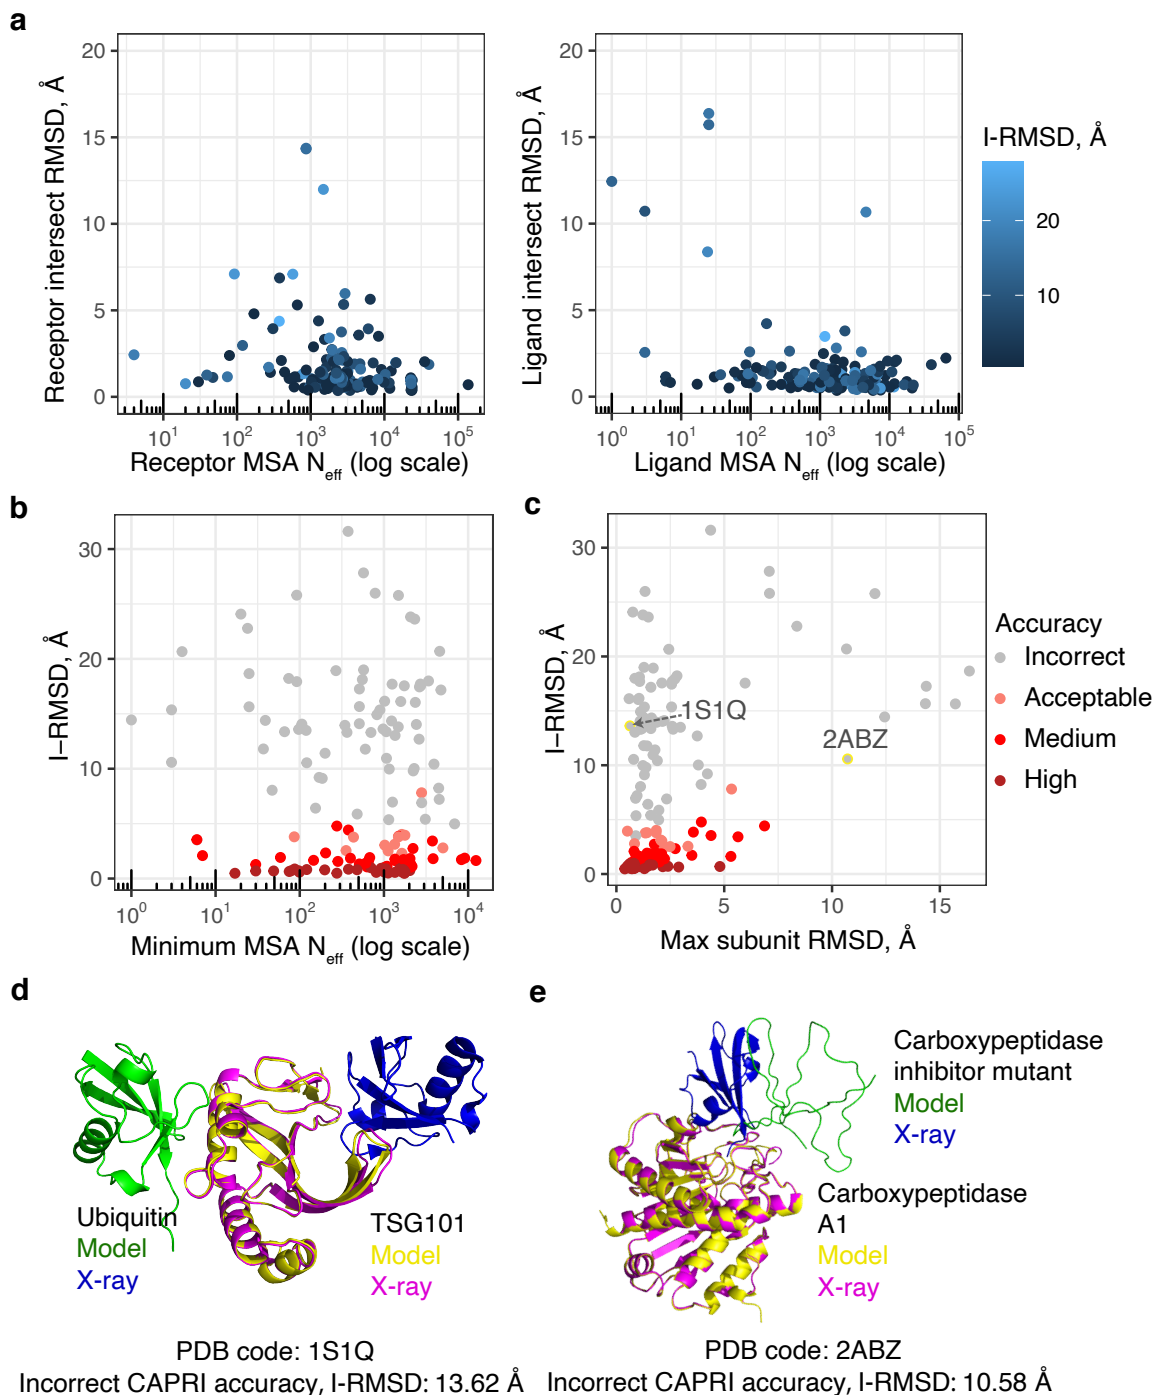

**Figure S3. Comparison of MSA depth, subunit accuracy, and AlphaFold model quality.** (a) Scatter plots depicting the relationship between ligand or receptor intersect RMSD and MSA depth (log scale; measured by  $N_{\text{eff}}$ , see Materials and Methods for details). Each point represents the top pTM model from each of the 149 cases modeled by AlphaFold. Points are colored by I-RMSD of the docking model. Scatter plot depicting the relationship between the docking model I-RMSD and (b) minimum ligand and receptor MSA depth (log scale, measured by  $N_{\text{eff}}$ ), or (c) Maximum subunit (ligand or receptor) RMSD from X-ray structure. Points are colored by CAPRI accuracy and represent the top-ranked model (by pTM score) from each of the 149 cases modeled by AlphaFold. (d) Native and top-ranked AlphaFold model (pTM = 0.89) for PDB 1S1Q, superposed by TSG101. (e) Native and top-ranked AlphaFold model (pTM = 0.81) for PDB 2ABZ, superposed by Carboxypeptidase A1. Model and the X-ray structure chains are colored separately as indicated. Unresolved regions modeled by AlphaFold were omitted from the figures.

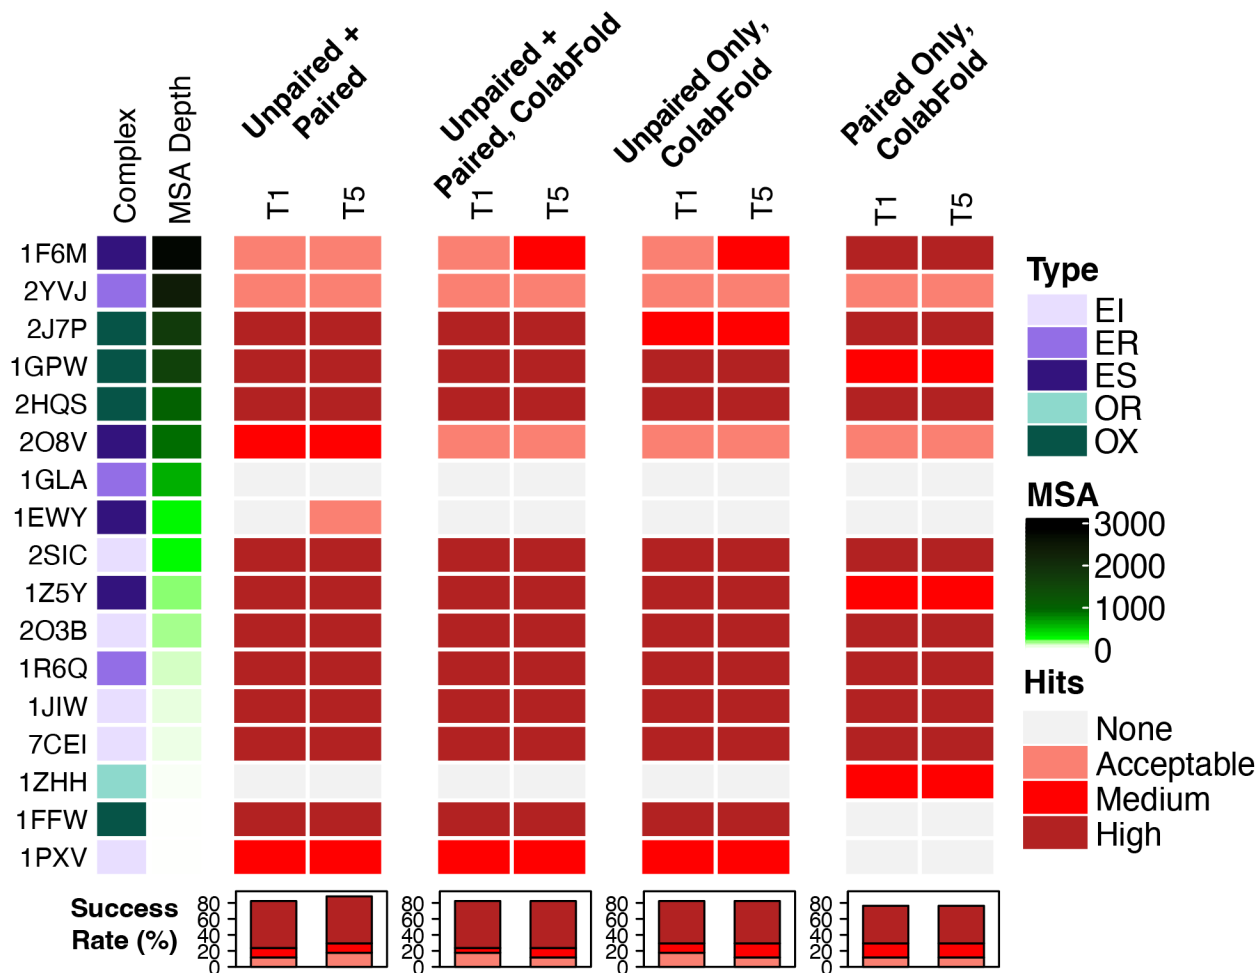

**Figure S4. Testing the impact of MSA modes on AlphaFold-Multimer accuracy.** Models were generated with AlphaFold-Multimer without templates on a set of 17 cases from BM5.5 possessing chains from same prokaryotic species. Modeling was performed locally using AlphaFold-Multimer from the DeepMind Github downloaded protocol, or AlphaFold-Multimer in ColabFold, with the latter noted in column headers. All models were assessed for CAPRI accuracy, and model quality of top 1 and top 5 predictions (ranked by AlphaFold-Multimer score,  $0.8 \cdot \text{ipTM} + 0.2 \cdot \text{pTM}$ ) is shown and colored by CAPRI model accuracy as indicated in the key on right (Hits). Cases are sorted by the depth of the paired MSA ( $N_{\text{eff}}$ ), generated by the AlphaFold-Multimer protocol in ColabFold, from the largest to the smallest values.

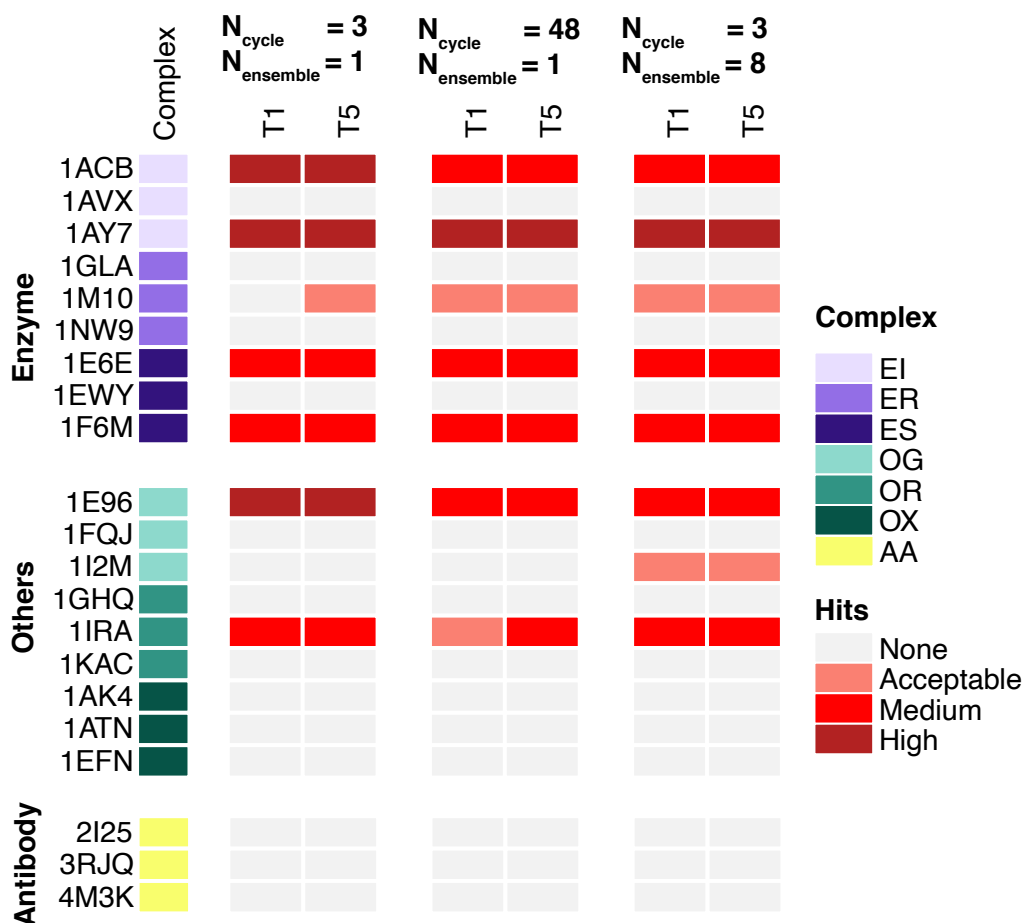

**Figure S5. Testing the impact of alternative parameters on AlphaFold accuracy.** Models were generated with AlphaFold for 21 test cases, representing three cases from each of the 7 complex categories, chosen by random. By default,  $N_{cycle}$  is set to 3 and  $N_{ensemble}$  is set to 1. To test the impact of using alternative parameters,  $N_{cycle}$  and  $N_{ensemble}$  were respectively increased to 48 and 8, while all other components of AlphaFold pipeline were kept constant. All models were assessed for near-native predictions using CAPRI criteria for High, Medium and Acceptable accuracy in the top-ranked (T1) and top 5 (T5) models. Complex category: Enzyme-inhibitor (EI), enzyme complex with a regulatory or accessory chain (ER), enzyme-substrate (ES), others, G-protein containing (OG), others, receptor-containing (OR); others, miscellaneous (OX), antibody-antigen (AA).

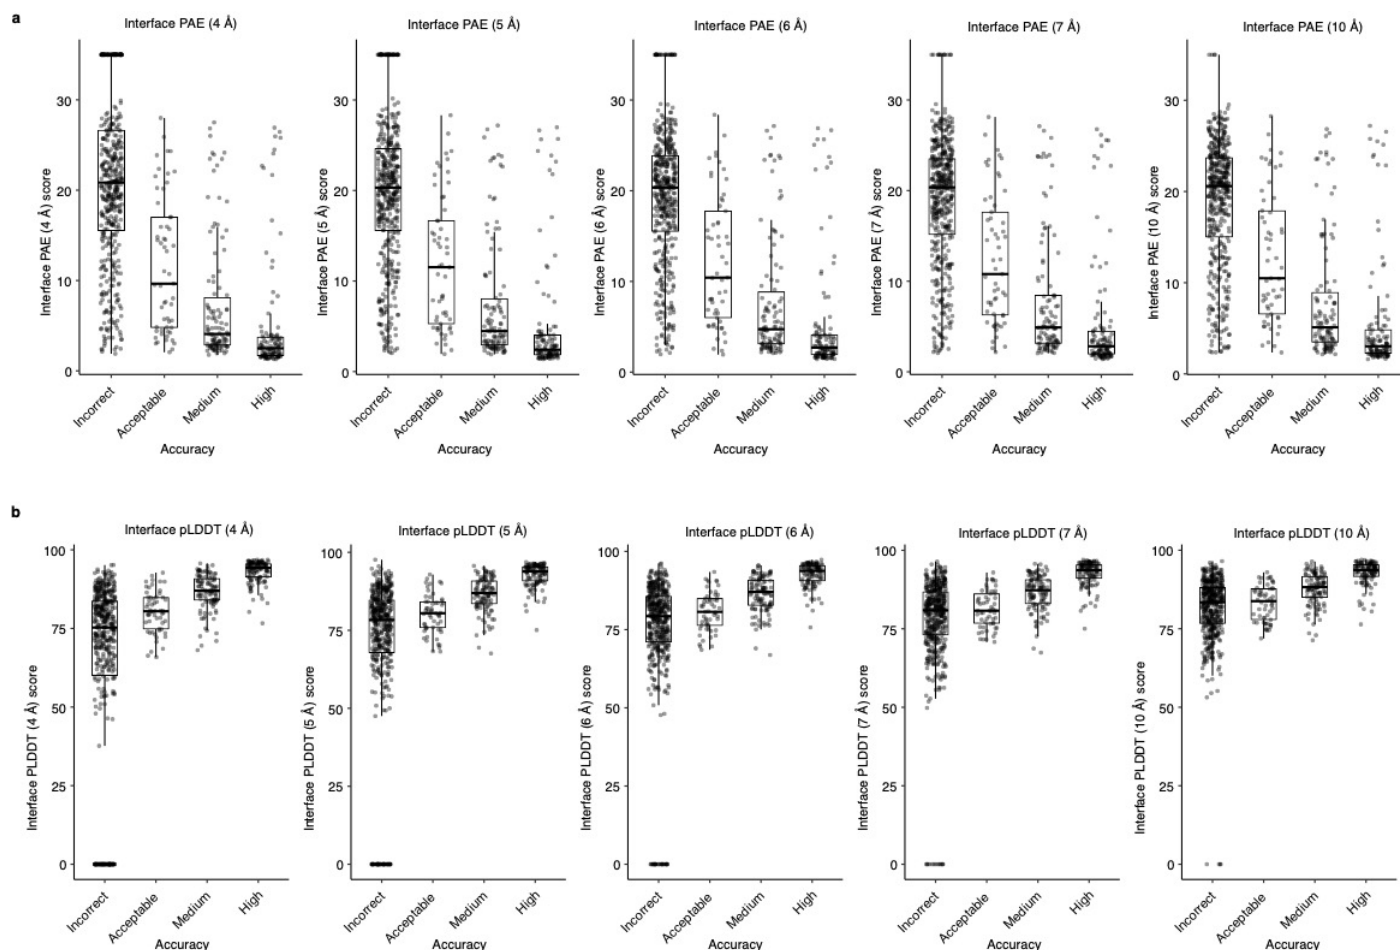

**Figure S6. Alternative formulation of interface accuracy metrics calculated from AlphaFold predictions (PAE, pLDDT)** (a) Interface PAE within a distance cutoff of 4 Å, 5 Å, 6 Å, 7 Å and 10 Å grouped by docking model accuracy. (b) Interface pLDDT within a distance cutoff of 4 Å, 5 Å, 6 Å, 7 Å and 10 Å, grouped by docking model accuracy. An interface pLDDT score of 0 and an interface PAE score of 35 are assigned to models without interface contacts within the distance cutoff specified. See also Table S2 for AUC values for interface pLDDT and interface PAE as classifiers for docking model accuracy.

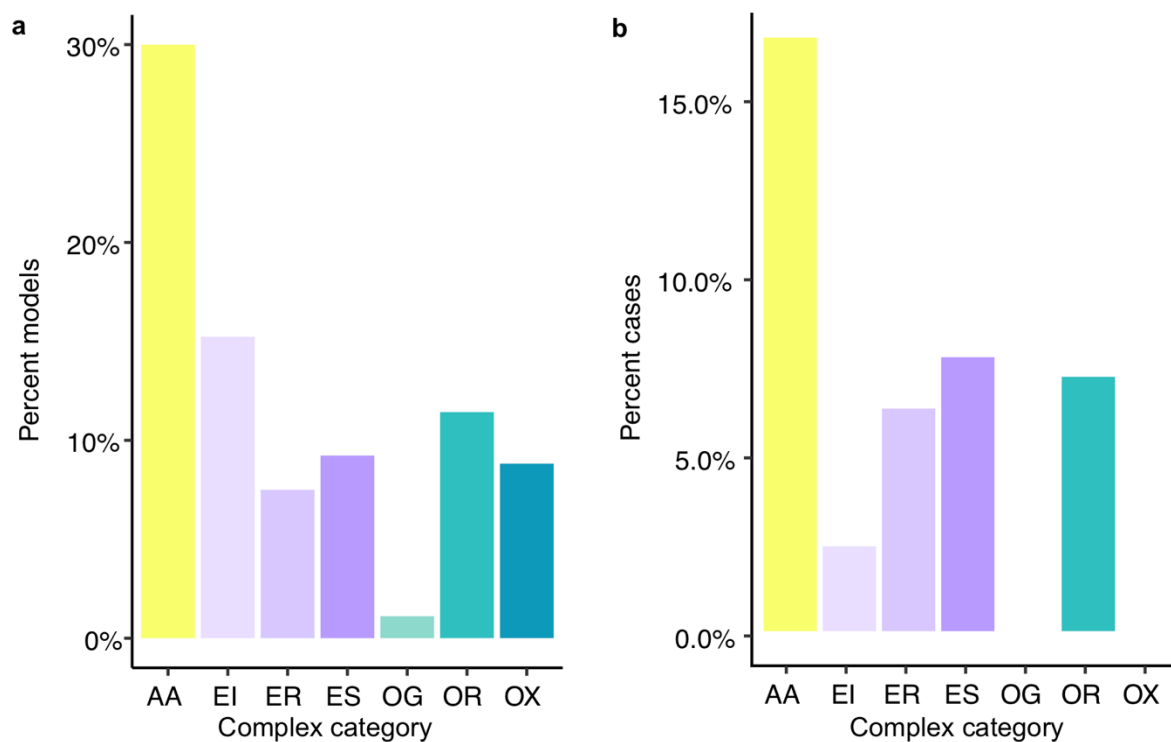

**Figure S7. Distribution of AlphaFold models without inter-chain atomic contacts by complex category.** (a) Percentage of AlphaFold models without inter-chain atomic contacts within 4 Å distance cutoff per complex category. (b) Percentage of cases in which the top-ranked model (ranked by pTM) predicted by AlphaFold has no inter-chain atomic contacts within 4 Å distance cutoff in each complex category. Complex category: Antibody-antigen (AA), enzyme-inhibitor (EI), enzyme complex with a regulatory or accessory chain (ER), enzyme-substrate (ES), others, G-protein containing (OG), others, receptor-containing (OR); others, miscellaneous (OX).

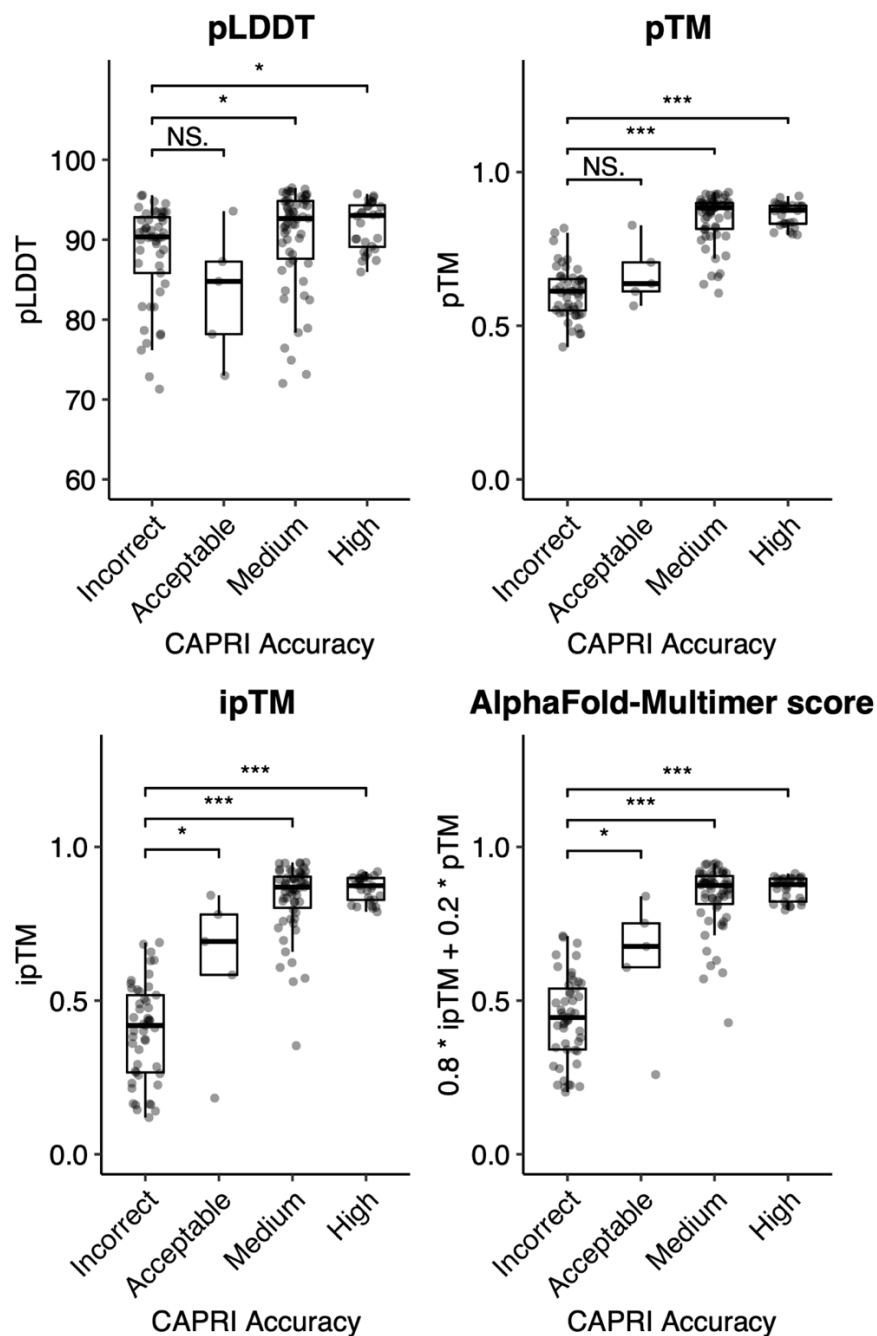

**Figure S8. Discrimination of AlphaFold-Multimer model accuracies with pLDDT, pTM, ipTM, and AlphaFold-Multimer model scores.** A benchmark set of recently released complex structures (from Table 2) was modeled with AlphaFold-Multimer, and all five models from AlphaFold-Multimer per test case were assessed for accuracy using CAPRI criteria. Accuracy-binned models are shown in comparison with pLDDT, pTM, ipTM, and AlphaFold-Multimer ( $0.8 \cdot \text{ipTM} + 0.2 \cdot \text{pTM}$ ) scores. Statistical significance values (Wilcoxon rank-sum test) are shown for group comparisons (NS:  $p > 0.05$ , \*:  $p \leq 0.05$ , \*\*\*:  $p \leq 0.001$ ).



**Table S1.** Heterodimeric protein-protein complexes from BM5.5 tested in this study.

| <b>PDB code</b> | <b>Receptor</b>                       | <b>Ligand</b>                             | <b>Complex Category<sup>a</sup></b> | <b>BSA (Å<sup>2</sup>)<sup>b</sup></b> | <b>Protein source<sup>c</sup></b> |
|-----------------|---------------------------------------|-------------------------------------------|-------------------------------------|----------------------------------------|-----------------------------------|
| 1ACB            | Chymotrypsin                          | Eglin C                                   | EI                                  | 1544                                   | ME                                |
| 1AK4            | Cyclophilin                           | HIV capsid                                | OX                                  | 1029                                   | MM                                |
| 1ATN            | Actin                                 | Dnase I                                   | OX                                  | 1774                                   | ME                                |
| 1AVX            | Porcine trypsin                       | Soybean trypsin inhibitor                 | EI                                  | 1585                                   | ME                                |
| 1AY7            | RNase Sa                              | Barstar                                   | EI                                  | 1237                                   | MB                                |
| 1B6C            | FKBP binding protein                  | TGFbeta receptor                          | OX                                  | 1752                                   | SE                                |
| 1BKD            | Ras GTPase                            | Son of sevenless                          | OG                                  | 3163                                   | SE                                |
| 1BUH            | CDK2 kinase                           | Ckshs1                                    | EI                                  | 1324                                   | SE                                |
| 1BVN            | Alpha-amylase                         | Tendamistat                               | EI                                  | 2222                                   | MM                                |
| 1CGI            | Bovine chymotrypsinogen               | PSTI                                      | EI                                  | 2053                                   | ME                                |
| 1CLV            | Alpha-amylase                         | Alpha-amylase inhibitor                   | EI                                  | 2087                                   | ME                                |
| 1D6R            | Bovine trypsin                        | Bowman-Birk inhibitor                     | EI                                  | 1408                                   | ME                                |
| 1DFJ            | Ribonuclease A                        | Rnase inhibitor                           | EI                                  | 2582                                   | ME                                |
| 1E6E            | Adrenoxin reductase                   | Adrenoxin                                 | ES                                  | 2315                                   | SE                                |
| 1E96            | Rac GTPase                            | p67 Phox                                  | OG                                  | 1179                                   | SE                                |
| 1EAW            | Matriptase                            | BPTI                                      | EI                                  | 1866                                   | ME                                |
| 1EFN            | HIV-1-NEF protein                     | SH3 domain                                | OX                                  | 1254                                   | MM                                |
| 1EWY            | Ferredoxin reductase                  | Ferredoxin                                | ES                                  | 1502                                   | SB                                |
| 1F34            | Porcine pepsin                        | Ascaris inhibitor 3                       | EI                                  | 3038                                   | ME                                |
| 1F6M            | Thioredoxin reductase                 | Thioredoxin 1                             | ES                                  | 1821                                   | SB                                |
| 1FFW            | Chemotaxis protein CheY               | Chemotaxis protein CheA                   | OX                                  | 1166                                   | SB                                |
| 1FLE            | Elastase                              | Elafin                                    | EI                                  | 1763                                   | ME                                |
| 1FQ1            | CDK2 kinase                           | CDK inhibitor 3                           | ES                                  | 1832                                   | SE                                |
| 1FQJ            | Gt-alpha                              | RGS9                                      | OG                                  | 1806                                   | ME                                |
| 1GCQ            | GRB2 C-ter SH3 domain                 | Vav N-ter SH3 domain                      | OX                                  | 1208                                   | ME                                |
| 1GHQ            | Complement C3                         | Epstein-Barr virus receptor CR2           | OR                                  | 800                                    | SE                                |
| 1GL1            | Alpha-chymotrypsin                    | Protease inhibitor LCMI II                | EI                                  | 1591                                   | ME                                |
| 1GLA            | Glycerol Kinase                       | Glucose specific phosphocarrier           | ER                                  | 1304                                   | SB                                |
| 1GPW            | HISF protein                          | Amidotransferase HISH                     | OX                                  | 2097                                   | SB                                |
| 1GRN            | CDC42 GTPase                          | CDC42 GAP                                 | OG                                  | 2332                                   | SE                                |
| 1GXD            | proMMP2 type IV collagenase           | Metalloproteinase inhibitor 2             | EI                                  | 2445                                   | SE                                |
| 1H1V            | Actin                                 | Gelsolin                                  | OX                                  | 2071                                   | ME                                |
| 1H9D            | Runx1 domain of CBFA1                 | Dimerisation domain of CBF-Beta           | OX                                  | 2121                                   | SE                                |
| 1HE1            | Rac GTPase                            | Pseudomonas toxin GAP dom.                | OG                                  | 2113                                   | MM                                |
| 1HE8            | Ras GTPase                            | PIP3 kinase                               | OG                                  | 1305                                   | SE                                |
| 1I2M            | Ran GTPase                            | RCC1                                      | OG                                  | 2779                                   | SE                                |
| 1IBR            | Ran GTPase                            | Importin beta                             | OG                                  | 2270                                   | SE                                |
| 1IRA            | Interleukin-1 receptor                | Interleukin-1 receptor antagonist protein | OR                                  | 3367                                   | SE                                |
| 1J2J            | Arf1 GTPase                           | GAT domain of GGA1                        | OG                                  | 1209                                   | ME                                |
| 1JIW            | Alkaline metalloproteinase            | Proteinase inhibitor                      | EI                                  | 1997                                   | SB                                |
| 1JK9            | CCS metallochaperone                  | SOD1 superoxide dismutase                 | ES                                  | 2130                                   | SE                                |
| 1JTD            | BLIP-II                               | TEM-1 beta-lactamase                      | EI                                  | 2180                                   | MB                                |
| 1JTG            | Beta-lactamase inhibitor protein      | Beta-lactamase TEM-1                      | EI                                  | 2600                                   | MB                                |
| 1KAC            | Adenovirus fiber knob protein         | Adenovirus receptor                       | OR                                  | 1456                                   | MM                                |
| 1KTZ            | TGF-Beta                              | TGF-Beta receptor                         | OR                                  | 989                                    | SE                                |
| 1KXP            | Actin                                 | Vitamin D binding protein                 | OX                                  | 3341                                   | ME                                |
| 1LFD            | Ras                                   | RaIGDS Ras-interacting domain             | OG                                  | 1167                                   | ME                                |
| 1M10            | Von willebrand factor dom. A1         | Glycoprotein IB-Alpha                     | ER                                  | 2097                                   | SE                                |
| 1MAH            | Acetylcholinesterase                  | Fasciculin                                | EI                                  | 2145                                   | ME                                |
| 1MQ8            | ICAM-1 domain 1-2                     | Integrin Alpha-L I domain                 | OX                                  | 1253                                   | SE                                |
| 1NW9            | Capase-9                              | BIR3-XIAP                                 | ER                                  | 2112                                   | SE                                |
| 1OC0            | Plasminogen activator inhibitor-1     | Vitronectin Somatomedin B domain          | ER                                  | 1313                                   | SE                                |
| 1OPH            | Alpha-1-antitrypsin                   | Trypsinogen                               | EI                                  | 1360                                   | ME                                |
| 1OYV            | Subtilisin Carlsberg                  | Two-headed tomato inhibitor-II            | EI                                  | 1930                                   | MM                                |
| 1PPE            | Bovine trypsin                        | CMTI-1 squash inhibitor                   | EI                                  | 1688                                   | ME                                |
| 1PVH            | IL6 receptor Beta chain D2-D3 domains | Leukemia inhibitory factor                | OR                                  | 1403                                   | SE                                |

|      |                                                                          |                                               |    |      |       |
|------|--------------------------------------------------------------------------|-----------------------------------------------|----|------|-------|
| 1PXV | Cystein protease                                                         | Cystein protease inhibitor                    | EI | 2336 | SB    |
| 1QA9 | CD2                                                                      | CD58                                          | OX | 1353 | SE    |
| 1R0R | Subtilisin carlsberg                                                     | OMTKY                                         | EI | 1409 | MM    |
| 1R6Q | Clp protease subunit ClpA                                                | Clp protease adaptor protein ClpS             | ER | 1651 | SB    |
| 1R8S | Arf1 GTPase                                                              | Sec 7 domain                                  | OG | 2986 | ME    |
| 1RKE | Vinculin head                                                            | Vinculin tail                                 | OX | 2614 | SE    |
| 1S1Q | UEV domain                                                               | Ubiquitin                                     | OX | 1288 | SE    |
| 1SBB | T-cell receptor Beta                                                     | Staphylococcus enterotoxin B                  | OR | 1064 | MM    |
| 1SYX | Spliceosomal U5 15 kDa protein                                           | CD2 receptor binding protein 2 C-ter fragment | OX | 1293 | SE    |
| 1T6B | Anthrax protective antigen                                               | Anthrax toxin receptor                        | OR | 1948 | MM    |
| 1TMQ | alpha-amylase                                                            | RAGI inhibitor                                | EI | 2401 | ME    |
| 1UDI | Uracyl-DNA glycosylase                                                   | Glycosylase inhibitor                         | EI | 2022 | Viral |
| 1US7 | Heat shock protein 82 N-ter domain                                       | HSP 90 co-chaperone CDC37 C-ter domain        | ER | 1095 | ME    |
| 1WQ1 | Ras GTPase                                                               | Ras GAP                                       | OG | 2913 | SE    |
| 1XD3 | UCH-L3                                                                   | Ubiquitin                                     | OX | 2281 | SE    |
| 1XQS | HspBP1                                                                   | Hsp70 ATPase domain                           | OX | 2350 | SE    |
| 1Y64 | Actin                                                                    | BNI1 protein                                  | OX | 2745 | ME    |
| 1YVB | Falcpain 2                                                               | Cystatin                                      | EI | 1743 | ME    |
| 1Z0K | Rab4A GTPase                                                             | RAB4 binding domain of Rabenosyn              | OG | 1787 | SE    |
| 1Z5Y | N-term of DsbD                                                           | E.coli CCMG protein                           | ES | 1346 | SB    |
| 1ZHH | Autoinducer 2-binding periplasmic protein LuxP                           | Autoinducer 2 sensor kinase/phosphatase LuxQ  | OR | 2189 | SB    |
| 1ZHI | BAH domain of Orc1                                                       | Sir Orc-interaction domain                    | OX | 1322 | SE    |
| 1ZLI | Carboxypeptidase B                                                       | Tick carboxypeptidase inhibitor               | EI | 2084 | ME    |
| 1ZM4 | Elongation factor 2                                                      | Diphtheria toxin A catalytic domain           | ES | 1554 | MM    |
| 2A1A | Eukayotic translation initiation factor 2-alpha kinase 2                 | eIF2 alpha subunit                            | ES | 1186 | ME    |
| 2A5T | NMDA receptor R1-4A subunit ligand-binding core                          | NMDA receptor R2A subunit ligand-binding core | OX | 1892 | ME    |
| 2A9K | Ras-related protein Ral-A                                                | Mono-ADP-ribosyltransferase C3                | ES | 1751 | MM    |
| 2ABZ | Carboxypeptidase A1                                                      | Leech carboxypeptidase inhibitor              | EI | 1443 | ME    |
| 2AJF | ACE2                                                                     | SARS spike protein receptor binding domain    | OR | 1704 | MM    |
| 2AYO | Ubiquitin carboxyl-terminal hydrolase 14                                 | Ubiquitin                                     | ER | 3027 | SE    |
| 2B42 | Xylanase                                                                 | Xylanase inhibitor                            | EI | 2520 | MM    |
| 2BTF | Actin                                                                    | Profilin                                      | OX | 2063 | SE    |
| 2C0L | PTS1 and TRP region of PEX5                                              | SCP2                                          | OX | 2013 | SE    |
| 2CFH | BET3                                                                     | TPC6                                          | OX | 2384 | SE    |
| 2FJU | Phospholipase Beta 2                                                     | Rac GTPase                                    | OG | 1245 | SE    |
| 2G77 | GTPase-activating protein GYP1                                           | Ras-related protein Rab-33B                   | OG | 2524 | ME    |
| 2GAF | Poly(A) polymerase VP55                                                  | Vaccinia protein VP39                         | ER | 3368 | Viral |
| 2GTP | Alpha-1 subunit Guanine nucleotide-binding protein G(I), alpha-1 subunit | RGS1                                          | OG | 1442 | SE    |
| 2H7V | Rac GTPase                                                               | YpkA                                          | OG | 1574 | MM    |
| 2HLE | Ephrin B4 receptor                                                       | Ephrin B2 ectodomain                          | OR | 2116 | SE    |
| 2HQS | TolB                                                                     | Pal                                           | OX | 2333 | SB    |
| 2HRK | Glutamyl-t-RNA synthetase                                                | GU-4 nucleic binding protein                  | OX | 1595 | SE    |
| 2I25 | Shark single domain antigen receptor                                     | Lysozyme                                      | AA | 1425 | ME    |
| 2I9B | Urokinase plasminogen activator surface receptor                         | Urokinase-type plasminogen activator          | OR | 2371 | SE    |
| 2IDO | DNA polymerase III $\epsilon$ exonuclease domain                         | HOT protein (P1 phage)                        | ES | 1953 | MM    |
| 2J0T | MMP1 Intersitial collagenase                                             | Metalloproteinase inhibitor 1                 | EI | 1477 | SE    |
| 2J7P | SRP GTPase Ffh                                                           | Cell division protein FtsY                    | OX | 3008 | SB    |
| 2NZ8 | Rac GTPase                                                               | DH/PH domain of TRIO                          | ER | 2599 | SE    |
| 2O3B | NucA nuclease                                                            | NuiA nuclease inhibitor                       | EI | 1675 | SB    |
| 2O8V | PAPS reductase                                                           | Thioredoxin                                   | ES | 1619 | SB    |
| 2OOB | Ubiquitin ligase                                                         | Ubiquitin                                     | ES | 808  | ME    |
| 2OT3 | Rab21 GTPase                                                             | Rabex-5 VPS9 domain                           | ER | 2306 | SE    |

|      |                                                   |                                                       |    |      |    |
|------|---------------------------------------------------|-------------------------------------------------------|----|------|----|
| 2OUL | Falcipain 2                                       | Chagasin                                              | EI | 1933 | ME |
| 2OZA | MAP kinase 14                                     | MAP kinase-activated protein kinase 2                 | OX | 6248 | ME |
| 2PCC | Cyt C peroxidase                                  | Cytochrome C                                          | ES | 1141 | SE |
| 2SIC | Subtilisin                                        | Streptomyces subtilisin inhibitor                     | EI | 1617 | MB |
| 2SNI | Subtilisin                                        | Chymotrypsin inhibitor 2                              | EI | 1628 | MM |
| 2UUY | Trypsin                                           | Tryptase inhibitor from tick                          | EI | 1280 | ME |
| 2VDB | Serum albumin                                     | Peptostreptococcal albumin-binding protein            | OX | 1798 | MM |
| 2X9A | TolA C-terminal domain                            | G3P TolA binding domain                               | OR | 1571 | MM |
| 2YVJ | Ferredoxin reductase BPHA4                        | Biphenyl dioxygenase ferredoxin subunit               | ER | 1377 | SB |
| 2Z0E | Cysteine protease Atg4B                           | Microtubule-associated proteins 1A/1B light chain 3B  | ER | 2478 | ME |
| 3A4S | SUMO-conjugating enzyme UBC9                      | NFATC2-interacting protein SLD2 ubiquitin-like domain | EI | 1116 | ME |
| 3AAD | Double bromodomain                                | Histone chaperone ASF1                                | OX | 1654 | SE |
| 3BIW | Neuroigin-1                                       | Neuroigin-1-beta                                      | OX | 1191 | SE |
| 3BX7 | Lipocalin 2                                       | CTLA-4 extracellular domain                           | OX | 2349 | SE |
| 3CPH | Rab GDP-dissociation inhibitor                    | Ras-related protein Sec4                              | OG | 1685 | SE |
| 3D5S | Complement C3d fragment                           | Fibrinogen-binding protein C-ter domain               | OX | 1620 | MM |
| 3DAW | Alpha actin                                       | Twinfilin-1 C-terminal domain                         | OX | 2323 | ME |
| 3F1P | HIF2 alpha C-terminal PAS domain                  | ARNT C-terminal PAS domain                            | OX | 1919 | SE |
| 3FN1 | UQ_con domain from NEDD8-conjugating enzyme UBE2F | NEDD8-activating enzyme E1 catalytic subunit          | ER | 1897 | SE |
| 3H2V | Vinculin tail domain                              | Raver1 RRM1 domain                                    | OX | 1263 | SE |
| 3K75 | DNA polymerase beta                               | Reduced XRCC1, N-terminal domain                      | ER | 1195 | ME |
| 3PC8 | DNA repair protein XRCC1                          | DNA ligase III-alpha BRCT domain                      | ER | 1240 | ME |
| 3RJQ | A12                                               | C1086 HIV gp120                                       | AA | 1734 | MM |
| 3S9D | IFNAR2                                            | IFNa2                                                 | OR | 1841 | SE |
| 3SGQ | Streptogrisin B                                   | Ovomucoid inhibitor third domain                      | EI | 1211 | MM |
| 3VLB | EDGP                                              | Xyloglucan-specific endo-beta-1,4-glucanase A         | EI | 2020 | ME |
| 4CPA | Carboxypeptidase A                                | Potato carboxypeptidase inhibitor                     | EI | 1175 | ME |
| 4FZA | MO25 alpha                                        | Serine/threonine-protein kinase MST4                  | ER | 1695 | SE |
| 4H03 | Iota toxin component IA                           | Alpha actin                                           | ES | 1474 | MM |
| 4IZ7 | Non-phosphorylated ERK                            | PEA-15 Death Effector Domain                          | EI | 1202 | ME |
| 4M3K | cAb-H7S                                           | B. licheniformis beta-lactamase                       | AA | 1588 | MM |
| 4M76 | C3D                                               | Integrin alpha-M CD11B A-domain                       | OR | 1046 | SE |
| 4POU | VHHmetal                                          | bovine RNase A                                        | AA | 1313 | ME |
| 4Y7M | nb25                                              | E coli TssM CTD                                       | AA | 1103 | MM |
| 5E5M | H11                                               | mouse CTLA-4                                          | AA | 1341 | ME |
| 5HGG | Nb4                                               | uPA                                                   | AA | 1969 | ME |
| 5JMO | Nb14                                              | Furin                                                 | AA | 1394 | ME |
| 5SV3 | A3C8                                              | Ricin                                                 | AA | 1294 | ME |
| 5VNW | Nb.b201                                           | human serum albumin                                   | AA | 967  | MM |
| 6CWG | A9                                                | Ricin                                                 | AA | 1151 | ME |
| 6DBG | R303                                              | Listeria monocytogenes internalin B                   | AA | 1525 | MM |
| 7CEI | Colicin E7 nuclease                               | Im7 immunity protein                                  | EI | 1384 | SB |
| BAAD | Double bromodomain                                | Histone chaperone ASF1                                | OX | 1461 | SE |
| BOYV | Subtilisin Carlsberg                              | Two-headed tomato inhibitor-II                        | EI | 1280 | MM |

<sup>a</sup> Complex category: Antibody-antigen (AA), enzyme-inhibitor (EI), enzyme-substrate (ES), enzyme complex with a regulatory or accessory chain (ER), others, G-protein containing (OG), others, receptor-containing (OR); others, miscellaneous (OX).

<sup>b</sup> Interface buried surface areas.

<sup>c</sup> Based on the source organisms for receptor and ligand protein chains in the Protein Data Bank (PDB) <sup>1</sup>, each case is classified as SE (“Single, Eukaryotic”, denoting proteins from the same eukaryotic organism), SB (“Single, Bacterial”, denoting proteins from the same bacterial organism), ME (“Multiple, Eukaryotic”, denoting proteins from different eukaryotic organisms), MB (“Multiple, Bacterial”, denoting proteins from different bacterial organisms), Viral (denoting proteins from viruses), or MM (“Multiple, Mix”, denoting proteins from mixed origins).

**Table S2.** Analysis of geometric and energetic interface features associated with AlphaFold success or failure.

| <b>Interface Feature<sup>a</sup></b> | <b>p-value Incorrect vs. Medium/High<sup>b</sup></b> | <b>p-value Incorrect vs. High<sup>b</sup></b> |
|--------------------------------------|------------------------------------------------------|-----------------------------------------------|
| nres_tot                             | <b>0.02001</b>                                       | <b>0.00022</b>                                |
| SASA_Tot                             | 0.21257                                              | <b>0.00253</b>                                |
| nres_percent                         | <b>0.00091</b>                                       | <b>0.00412</b>                                |
| BSA_percent                          | <b>0.00038</b>                                       | <b>0.00605</b>                                |
| per_residue_energy_int               | 0.53604                                              | <b>0.04757</b>                                |
| hbond_E_fraction                     | 0.19513                                              | 0.12584                                       |
| sc_value                             | 0.34752                                              | 0.18198                                       |
| dG_cross                             | <b>0.00432</b>                                       | 0.22077                                       |
| packstat                             | 0.94851                                              | 0.34572                                       |
| nres_int                             | 0.07936                                              | 0.58908                                       |
| ZRANK2                               | <b>0.00195</b>                                       | 0.66473                                       |
| BSA                                  | <b>0.00736</b>                                       | 0.84187                                       |
| delta_unsatHbonds                    | 0.19421                                              | 0.92855                                       |
| hbonds_int                           | 0.17700                                              | 0.99173                                       |

<sup>a</sup>Interface geometric or energetic feature, calculated using experimentally determined complex structures with the InterfaceAnalyzer protocol in Rosetta<sup>2</sup>, with the exception of ZRANK2, SASA\_Tot, BSA, BSA\_percent, and nres\_percent values. ZRANK2 scores were calculated with the ZRANK executable<sup>3</sup>, SASA\_Tot and BSA represent the total accessible surface area of the individual proteins and the buried interface surface area, calculated by naccess<sup>4</sup>. BSA\_percent and nres\_percent represent the proportion of total surface area or total residues in the interface, calculated using BSA and SASA\_Tot (BSA\_percent), or nres\_tot and nres\_int (nres\_percent).

<sup>b</sup>P-values were calculated using Wilcoxon rank-sum test for sets of BM5.5 cases based on AlphaFold accuracy in the five models generated for that complex (all Incorrect, at least one model with Medium or High accuracy, at least one model with High accuracy). Significant p-values ( $p < 0.05$ ) are shown in bold.

**Table S3.** Area under the ROC curve (AUC) value for protein quality classes as a function of interface scores calculated from AlphaFold predictions.

| Score <sup>a</sup>     | Binary classification |                               | Multi-class classification |
|------------------------|-----------------------|-------------------------------|----------------------------|
|                        | Incorrect vs. High    | Incorrect vs. Medium and High |                            |
| Interface PAE (4 Å)    | 0.93                  | 0.90                          | 0.81                       |
| Interface PAE (5 Å)    | 0.92                  | 0.89                          | 0.81                       |
| Interface PAE (6 Å)    | 0.91                  | 0.89                          | 0.80                       |
| Interface PAE (7 Å)    | 0.91                  | 0.88                          | 0.80                       |
| Interface PAE (10 Å)   | 0.91                  | 0.88                          | 0.80                       |
| Interface pLDDT (4 Å)  | 0.97                  | 0.90                          | 0.84                       |
| Interface pLDDT (5 Å)  | 0.95                  | 0.88                          | 0.82                       |
| Interface pLDDT (6 Å)  | 0.94                  | 0.85                          | 0.80                       |
| Interface pLDDT (7 Å)  | 0.93                  | 0.83                          | 0.77                       |
| Interface pLDDT (10 Å) | 0.91                  | 0.81                          | 0.77                       |

<sup>a</sup> Scoring methods. “Interface PAE”: the average PAE score of pairs of interface residues within the interface distance cutoff specified in parenthesis; “Interface pLDDT”: the average pLDDT of interface residues within the interface distance cutoff specified in parenthesis.

**Table S4.** Additional antibody-antigen complex test cases and AlphaFold prediction success.

| <b>PDB</b> | <b>Antibody</b>        | <b>Antigen</b>                | <b>Type<sup>a</sup></b> | <b>AlphaFold T1<sup>b</sup></b> | <b>AlphaFold T5<sup>b</sup></b> |
|------------|------------------------|-------------------------------|-------------------------|---------------------------------|---------------------------------|
| 5F72       | LS146                  | KEAP1                         | ab                      | Incorrect                       | Incorrect                       |
| 1DZB       | 1F9                    | HEW                           | ab                      | Incorrect                       | Incorrect                       |
| 3UZE       | 4E11                   | Dengue E DIII                 | ab                      | Incorrect                       | Incorrect                       |
| 6EJM       | scFv 5                 | CD81 LEL                      | ab                      | Incorrect                       | Incorrect                       |
| 5DFW       | K13                    | CD81 LEL                      | ab                      | Incorrect                       | Incorrect                       |
| 6I07       | MM131                  | EpCAM                         | ab                      | Incorrect                       | Incorrect                       |
| 5JYM       | TSP11                  | P-cadherin                    | ab                      | Incorrect                       | Incorrect                       |
| 4NIK       | F5                     | Gankyrin                      | ab                      | <b>Medium</b>                   | <b>Medium</b>                   |
| 5JYL       | TSP7                   | P-cadherin                    | ab                      | Incorrect                       | Incorrect                       |
| 6TOU       | RVC20                  | Rabies gp                     | ab                      | Incorrect                       | Incorrect                       |
| 6EK2       | scFv 10                | CD81 LEL                      | ab                      | Incorrect                       | Incorrect                       |
| 4YJZ       | H2526                  | H1 HA                         | ab                      | Incorrect                       | Incorrect                       |
| 3UX9       | AIFN $\alpha$ 1bScFv01 | interferon alpha              | ab                      | Incorrect                       | Incorrect                       |
| 6OAN       | Antibody 053054        | P vivax DBP                   | ab                      | <b>Medium</b>                   | <b>Medium</b>                   |
| 6J71       | HUA21                  | HER2                          | ab                      | Incorrect                       | Incorrect                       |
| 7DET       | PR961                  | SARS-CoV-2 RBD                | ab                      | Incorrect                       | Incorrect                       |
| 7DEO       | PR1077                 | SARS-CoV-2 RBD                | ab                      | Incorrect                       | Incorrect                       |
| 6WAQ       | VHH-72                 | SARS-CoV RBD                  | nano                    | Incorrect                       | Incorrect                       |
| 6EY0       | NB01                   | PorM                          | nano                    | Incorrect                       | Incorrect                       |
| 6OQ7       | E3                     | Clostridium difficile toxin B | nano                    | Incorrect                       | Incorrect                       |

<sup>a</sup> Antibody type: “ab”: heavy-light chain antibody, “nano”: nanobody/VHH.

<sup>b</sup> AlphaFold modeling accuracy in top 1 and top 5 models (ranked by pTM). Model quality was assessed by CAPRI criteria. Medium CAPRI accuracy levels are highlighted with bold font.

**Table S5.** AlphaFold modeling success for VLR-antigen and repebody-antigen complexes.

| <b>PDB</b> | <b>Receptor</b> | <b>Antigen</b> | <b>Release Date<sup>a</sup></b> | <b>AlphaFold T1<sup>b</sup></b> | <b>AlphaFold T5<sup>b</sup></b> |
|------------|-----------------|----------------|---------------------------------|---------------------------------|---------------------------------|
| 3G3A       | VLRB.2D         | HEL            | 6/23/09                         | Incorrect                       | Incorrect                       |
| 3M18       | VLRA.R2.1       | HEL            | 6/30/10                         | Incorrect                       | Incorrect                       |
| 6BXC       | VLR9            | Zebrafish TLR5 | 5/9/18                          | Incorrect                       | Incorrect                       |
| 6BXA       | VLR2            | Zebrafish TLR5 | 5/9/18                          | <b>High</b>                     | <b>High</b>                     |
| 5B4P       | r-3E8 repebody  | Human C5a      | 4/12/17                         | Incorrect                       | Incorrect                       |
| 6HTF       | rF10 repebody   | Human Btk SH2  | 5/20/20                         | Incorrect                       | Incorrect                       |
| 6LBX       | Rb-H2 repebody  | HER2 Domain IV | 11/18/20                        | Incorrect                       | Incorrect                       |

<sup>a</sup>Release date of the experimentally determined complex structure in the Protein Data Bank.

<sup>b</sup>AlphaFold modeling accuracy in top 1 (T1) and top 5 (T5) models (ranked by pTM). Model quality was assessed by CAPRI criteria. High CAPRI accuracy levels are highlighted with bold font.

**Table S6.** AlphaFold-Multimer modeling success for recently released antibody-antigen complex structures.

| <b>PDB</b> | <b>Antibody</b> | <b>Antigen</b>                       | <b>Release Date<sup>a</sup></b> | <b>T1<sup>b</sup></b> | <b>T5<sup>b</sup></b> |
|------------|-----------------|--------------------------------------|---------------------------------|-----------------------|-----------------------|
| 6A4K       | 32D6 Fab        | H1N1 hemagglutinin                   | 3/27/19                         | Incorrect             | Incorrect             |
| 6HX4       | 1D9 Fab         | Alpha-1-antitrypsin                  | 10/30/19                        | <b>Medium</b>         | <b>Medium</b>         |
| 6P50       | 4A10 Fab        | Interleukin-7 receptor subunit alpha | 9/4/19                          | Incorrect             | Incorrect             |
| 6PXH       | G2 Fab          | MERS-CoV spike NTD                   | 9/25/19                         | Incorrect             | Incorrect             |
| 6Q0O       | H2227 Fab       | H1N1 hemagglutinin                   | 12/18/19                        | Acceptable            | Acceptable            |
| 6U54       | ZC nanobody     | Ebolavirus nucleoprotein             | 11/6/19                         | <b>Medium</b>         | <b>Medium</b>         |
| 6ZTR       | CQY684 Fab      | Cadherin-3                           | 5/5/21                          | Incorrect             | Incorrect             |

<sup>a</sup>Release date of the experimentally determined complex structure in the Protein Data Bank.

<sup>b</sup>AlphaFold-Multimer modeling accuracy in top 1 (T1) and top 5 (T5) models (ranked by AlphaFold-Multimer score). AlphaFold-Multimer was run with MSA input and without the use of structural templates. Model quality was assessed by CAPRI criteria. Medium CAPRI accuracy levels are highlighted with bold font.



**Table S7.** Expanded set of recent antibody-antigen complex structures used for benchmarking AlphaFold-Multimer.

| PDB <sup>a</sup> | Antibody                             | Antigen                                                                    | Nanobody <sup>b</sup> | Release Date <sup>c</sup> |
|------------------|--------------------------------------|----------------------------------------------------------------------------|-----------------------|---------------------------|
| 6a0z             | Fab 13D4                             | Hemagglutinin,Envelope glycoprotein                                        | 0                     | 2018-06-20                |
| 6dfj             | anti-Zika antibody Z021              | Dengue 1 Envelope DIII domain                                              | 0                     | 2018-10-24                |
| 6ddv             | Anti-MICA Fab fragment clone 6E1     | MHC class I chain-related protein A                                        | 0                     | 2018-10-24                |
| 6mej             | antibody HEPC3                       | E2 glycoprotein                                                            | 0                     | 2018-11-21                |
| 6e63             | TB31F Fab                            | Pf48/45                                                                    | 0                     | 2018-11-28                |
| 6h70             | Nano-62                              | Capsid protein VP1                                                         | 1                     | 2018-12-19                |
| 6iuv             | 3C11                                 | Hemagglutinin                                                              | 0                     | 2019-01-16                |
| 6a77             | Anti-human Robo1 antibody B5209B Fab | Roundabout homolog 1                                                       | 0                     | 2019-01-30                |
| 6iek             | Fab R12                              | NSmGnGc                                                                    | 0                     | 2019-04-10                |
| 6dkj             | hGIPR-Ab Fab                         | Gastric inhibitory polypeptide receptor                                    | 0                     | 2019-05-08                |
| 6gku             | Fab 6F5                              | Galectin-10                                                                | 0                     | 2019-06-05                |
| 6iap             | Fab NKp46-1                          | Natural cytotoxicity triggering receptor 1                                 | 0                     | 2019-06-12                |
| 6hhu             | nanobody AF684                       | S-layer protein sap                                                        | 1                     | 2019-07-24                |
| 6nmv             | Fab 218 anti-SIRP-alpha antibody     | Tyrosine-protein phosphatase non-receptor type substrate 1                 | 0                     | 2019-08-07                |
| 6oy4             | 7A1                                  | Der p 2 variant 3                                                          | 0                     | 2019-08-28                |
| 6hhc             | FXIA ANTIBODY Fab                    | Coagulation factor XI                                                      | 0                     | 2019-09-11                |
| 6mg7             | CH54 Fab                             | clade A/E 93TH057 HIV-1 gp120 core                                         | 0                     | 2019-09-25                |
| 6phc             | 2544 Fab                             | 25 kDa ookinete surface antigen                                            | 0                     | 2019-10-02                |
| 6hjx             | nanobody 72                          | Cys-loop ligand-gated ion channel                                          | 1                     | 2019-10-09                |
| 6j15             | GY-5 Fab                             | Programmed cell death protein 1                                            | 0                     | 2019-11-06                |
| 6ir2             | mCherry's nanobody LaM2              | MCherry fluorescent protein                                                | 1                     | 2019-11-13                |
| 6ir1             | mCherry's nanobody LaM4              | MCherry fluorescent protein                                                | 1                     | 2019-11-13                |
| 6ppg             | Fab MCAF5352A                        | Interleukin-17F                                                            | 0                     | 2019-12-11                |
| 6k0y             | mAb059c                              | Programmed cell death protein 1                                            | 0                     | 2019-12-11                |
| 6ion             | anti-C4.4A antibody 11H10            | Ly6/PLAUR domain-containing protein 3                                      | 0                     | 2020-01-15                |
| 6o9i             | Fab 2                                | Gastric inhibitory polypeptide receptor                                    | 0                     | 2020-01-22                |
| 6vel             | 66E8 Fab                             | Ubiquitin-like protein SMT3,Cadherin-1                                     | 0                     | 2020-01-29                |
| 6ssi             | NANOBODY 22                          | Cys-loop ligand-gated ion channel                                          | 1                     | 2020-02-12                |
| 6os2             | Nanobody Nb.AT110i1_le               | Type-1 angiotensin II receptor,Soluble cytochrome b562 BRIL fusion protein | 1                     | 2020-02-19                |
| 6uft             | JLK-G12                              | Botulinum neurotoxin type B                                                | 1                     | 2020-03-04                |
| 6ui1             | ciA-B5                               | BoNT/A                                                                     | 1                     | 2020-03-04                |
| 6lz9             | t8E4 Fab                             | Hepatocyte growth factor                                                   | 0                     | 2020-03-11                |
| 6tej             | Syb_NL5                              | Drug ABC transporter ATP-binding protein                                   | 1                     | 2020-04-01                |
| 6obo             | VHH antibody V6A6                    | Ricin                                                                      | 1                     | 2020-04-01                |
| 6ute             | Z032 Fab                             | Envelope domain III                                                        | 0                     | 2020-04-15                |
| 6xw7             | Nanobody NB-5829                     | Capsid protein                                                             | 1                     | 2020-04-22                |
| 6lr7             | Nanobody LaG16                       | Green fluorescent protein uv                                               | 1                     | 2020-04-29                |
| 6u9s             | 5A6 Fab                              | CD81 antigen                                                               | 0                     | 2020-05-13                |
| 6p3r             | Fab H5.31                            | Hemagglutinin                                                              | 0                     | 2020-05-27                |
| 7bwj             | P2B-2F6                              | Spike protein S1                                                           | 0                     | 2020-06-03                |
| 6m3b             | c25k23 Fab                           | Vitamin K-dependent protein C                                              | 0                     | 2020-07-08                |
| 7jmp             | COVA2-39                             | Spike protein S1                                                           | 0                     | 2020-08-26                |
| 6xkr             | Sasanlimab Fab                       | Programmed cell death protein 1                                            | 0                     | 2020-09-09                |
| 6wh9             | 1D10                                 | KR1                                                                        | 0                     | 2020-09-09                |
| 6w7s             | 2G10 Fab                             | EryAI                                                                      | 0                     | 2020-09-09                |
| 7chf             | BD-368-2 Fab                         | Spike protein S1                                                           | 0                     | 2020-09-16                |
| 6xzw             | Fab 4B3                              | Lipoprot_C domain-containing protein                                       | 0                     | 2020-10-14                |

|        |                                       |                                                            |   |            |
|--------|---------------------------------------|------------------------------------------------------------|---|------------|
| 7kfv   | C1A-B3 Fab                            | Spike glycoprotein                                         | 0 | 2020-12-02 |
| 7dm2   | Fab p4-170                            | Phosphate-binding protein PstS 1                           | 0 | 2020-12-23 |
| 6ye3   | UFKA-20                               | Interleukin-2                                              | 0 | 2020-12-30 |
| 7chz   | IgG26A                                | Interleukin-1 beta                                         | 0 | 2021-01-13 |
| 7kn6   | VHH V                                 | Spike protein S1                                           | 1 | 2021-01-20 |
| 7kn5   | VHH E                                 | Spike protein S1                                           | 1 | 2021-01-20 |
| 7kgj   | Sb45                                  | Spike glycoprotein                                         | 1 | 2021-02-03 |
| 7kzb   | CR3014-C8 antibody                    | Spike glycoprotein                                         | 0 | 2021-02-03 |
| 7bei   | COVOX-150                             | Spike glycoprotein                                         | 0 | 2021-03-03 |
| 7lbg   | Fab 13H11                             | Envelope glycoprotein H                                    | 0 | 2021-03-10 |
| 7jtg   | RM11-43 Fab                           | Envelope glycoprotein E2                                   | 0 | 2021-03-10 |
| 6was   | GN1_PA8 Fab                           | 1FD6 16055 V1V2 scaffold                                   | 0 | 2021-03-31 |
| 7lm8   | COVA1-16 Fab                          | Spike protein S1                                           | 0 | 2021-03-31 |
| 7lsg   | T025 Fab                              | Core protein                                               | 0 | 2021-04-07 |
| 7c88   | JS003                                 | Programmed cell death 1 ligand 1                           | 0 | 2021-04-14 |
| 7dr4   | anti-human IL-2 antibody, mouse Ig G, | Interleukin-2                                              | 0 | 2021-04-14 |
| 6ztr   | CQY684 Fab                            | Cadherin-3                                                 | 0 | 2021-05-05 |
| 7m7w   | Monoclonal antibody S2X259 Fab        | Spike protein S1                                           | 0 | 2021-05-05 |
| 7cho   | antibody P5A-1D2                      | Spike protein S1                                           | 0 | 2021-05-19 |
| 7mfu   | Synthetic Nanobody #14 (Sb14)         | Spike protein S1                                           | 1 | 2021-06-02 |
| 7djz   | MW01                                  | Spike protein S1                                           | 0 | 2021-06-09 |
| 7mhy   | 3H02 Fab                              | Protein-cysteine N-palmitoyltransferase                    |   |            |
| 7lue   | ADI-14442 Fab                         | HHAT                                                       | 0 | 2021-06-16 |
| 7o9s   | Fab nnHTN-Gn2                         | Fusion glycoprotein F0                                     | 0 | 2021-06-16 |
| 6ze1   | G11a nanobody                         | Envelope polyprotein                                       | 0 | 2021-06-23 |
| 7rmn   | Nb.C1                                 | Cystic fibrosis transmembrane conductance regulator        | 1 | 2021-06-30 |
| 7apj   | NB41                                  | Acid-sensing ion channel 1                                 | 1 | 2021-08-11 |
| 7kyo   | F100S PsaBC-Fab                       | RAC-alpha serine/threonine-protein kinase                  | 1 | 2021-08-25 |
| 7o06   | Camelid nanobody 10Z                  | Manganese ABC transporter, ATP-binding protein             | 0 | 2021-08-25 |
| 7e5o   | NT-193                                | Centrosomal protein of 164 kDa                             | 1 | 2021-09-08 |
| 7rah   | M2B10 Fab                             | Spike protein S1                                           | 0 | 2021-09-08 |
| 7kn3   | S-B8 Fab                              | Bifunctional adenylate cyclase                             |   |            |
| 7mzm   | PDI 215                               | toxin/hemolysin CyaA                                       | 0 | 2021-09-15 |
| 7mzj   | PDI 93                                | Spike protein S1                                           | 0 | 2021-09-22 |
| 7anq   | VHH P1.40 minibody anti-Cter PCSK9    | Spike protein S1                                           | 0 | 2021-10-06 |
| 7daa   | anti-basigin Fab                      | Spike protein S1                                           | 0 | 2021-10-06 |
| 7e72   | Fab 3H7                               | Proprotein convertase subtilisin/kexin type 1              | 1 | 2021-10-20 |
| 7bnv   | ION-300 Fab                           | Isoform 2 of Basigin                                       | 0 | 2021-10-20 |
| 7seg   | anti-CD16A Fab                        | Angiopoietin-1 receptor                                    | 0 | 2021-11-10 |
| 7dk2   | MW07                                  | Surface glycoprotein                                       | 0 | 2021-11-17 |
| 7ps2_1 | Beta-53                               | Low affinity immunoglobulin gamma Fc region receptor III-A | 0 | 2021-11-24 |
| 7ps2_2 | Beta-29 Fab                           | Spike protein S1                                           | 0 | 2021-12-08 |
| 7ps6   | Beta-54 Fab                           | Spike protein S1                                           | 0 | 2021-12-15 |
| 7ps0   | Beta-24                               | Spike protein S1                                           | 0 | 2021-12-15 |
| 7ps1   | Beta-27 Fab heavy chain               | Spike protein S1                                           | 0 | 2021-12-15 |
| 7lzp_1 | JPU-G11                               | Spike protein S1                                           | 0 | 2021-12-15 |
| 7q0i   | Beta-43                               | Botulinum neurotoxin A                                     | 1 | 2021-12-22 |
| 7na9   | JSG-C1                                | Spike protein S1                                           | 0 | 2021-12-22 |
| 7q0g   | Beta-49 Fab                           | Botulinum neurotoxin type B                                | 1 | 2021-12-22 |
|        |                                       | Spike protein S1                                           | 0 | 2021-12-22 |

|        |        |                             |   |            |
|--------|--------|-----------------------------|---|------------|
| 7lzp_2 | JPU-B9 | Botulinum neurotoxin A      | 1 | 2021-12-22 |
| 7l6v   | JPU-C1 | BoNT/A                      | 1 | 2021-12-22 |
| 7bbj   | mAb19  | 5'-nucleotidase             | 0 | 2021-12-29 |
| 7t5f   | JLJ-G3 | Botulinum neurotoxin type B | 1 | 2021-12-29 |

<sup>a</sup>Protein Data Bank (PDB) code of the antibody-antigen complex structure. For complexes with two distinct antibody-antigen interfaces in the same PDB structure (two antibodies in complex with the same antigen), the names are differentiated with “\_1” or “\_2” after the PDB code.

<sup>b</sup>Antibody is a nanobody (1) or heavy-light chain antibody (0).

<sup>c</sup>Release date of the structure in the PDB.

**Table S8.** AlphaFold-Multimer modeling performance for T cell receptor-peptide-MHC complexes.

| <b>PDB</b> | <b>Release date<sup>a</sup></b> | <b>TCR name</b> | <b>T1<sup>b</sup></b> | <b>T5<sup>b</sup></b> |
|------------|---------------------------------|-----------------|-----------------------|-----------------------|
| 6l9l       | 11/18/2020                      | 1D4             | Incorrect             | Acceptable            |
| 6mtm       | 2/13/2019                       | EM2             | <b>Medium</b>         | <b>Medium</b>         |
| 6r2l       | 2/26/2020                       | NYBR1           | Incorrect             | Incorrect             |
| 6rpa       | 1/15/2020                       | NYE_S2          | Incorrect             | Incorrect             |
| 6rpb       | 1/15/2020                       | NYE_S1          | Incorrect             | Incorrect             |
| 6rsy       | 4/15/2020                       | a7b2            | Incorrect             | Incorrect             |
| 6tro       | 6/24/2020                       | GVY01           | Acceptable            | Acceptable            |
| 6uk4       | 8/19/2020                       | 302 TIL         | Acceptable            | Acceptable            |
| 6uln       | 5/27/2020                       | 9d              | Acceptable            | Acceptable            |
| 6vrn       | 6/17/2020                       | 12-6            | Incorrect             | Incorrect             |
| 6vrn       | 6/17/2020                       | 38-10           | Incorrect             | Incorrect             |
| 7n1e       | 7/28/2021                       | pRLQ3           | Incorrect             | Acceptable            |
| 7n1f       | 7/28/2021                       | pYLQ7           | <b>Medium</b>         | <b>Medium</b>         |
| 7rm4       | 2/9/2022                        | 6-11            | Incorrect             | Incorrect             |

<sup>a</sup>Release date of the structure in the PDB.

<sup>b</sup>AlphaFold-Multimer modeling accuracy in top 1 (T1) and top 5 (T5) models (ranked by AlphaFold-Multimer score). Model quality was assessed by CAPRI criteria. AlphaFold-Multimer was run with MSA input and with the use of structural templates for individual component chains, excluding structures released after 4/30/2018 as chain templates. Medium CAPRI accuracy levels are highlighted with bold font.

## REFERENCES

1. Rose PW, Beran B, Bi C, et al. The RCSB Protein Data Bank: redesigned web site and web services. *Nucleic acids research*. 2011;39(Database issue):D392-401.
2. Lemn JK, Weitzner BD, Lewis SM, et al. Macromolecular modeling and design in Rosetta: recent methods and frameworks. *Nat Methods*. 2020;17(7):665-680.
3. Pierce B, Weng Z. A combination of rescoring and refinement significantly improves protein docking performance. *Proteins*. 2008;72(1):270-279.
4. *NACCESS* [computer program]. Version 2.1.1: Department of Biochemistry and Molecular Biology, University College London; 1993.
